# Supplementary material
Source: publisher site journal article supplement (https://www.dovepress.com/article/284781)
Supplement: Supplementary file 1 [file get_supplementary_file.php]

**Table S1.** Detailed primers for each gene amplified

| genes | Sequence (5’-30’) | Product size (bp) | References |
| --- | --- | --- | --- |
| **Staphylococci genes** | | | |
| *16SrRNA* | AACTCTGTTATTAGGGAAGAACA | 756 | [15] |
| CCACCTTCCTCCGGTTTGTCACC |
| *nuc* | GCGATTGATGGTGATACGGTT | 279 | [15] |
| AGCCAAGCCTTGACGAACTAAAGC |
| *mec A* | AAAATCGATGGTAAAGGTTGGC | 533 | [15] |
| AGTTCTGCAGTACCGGATTTGC |
| **SCCmec typing** | | | |
| SCC*mec* I | GCTTTAAAGAGTGTCGTTACAGG | 613 | [20] |
| GTTCTCTCATAGTATGACGTCC |
| SCC*mec* II | CGTTGAAGATGATGAAGCG | 398 | [20] |
| CGAAATCAATGGTTAATGGACC |
| SCC*mec* III | CCATATTGTGTACGATGCG | 280 | [20] |
| CCTTAGTTGTCGTAACAGATCG |
| SCC*mec*Ⅳa | GCCTTATTCGAAGAAACCG | 776 | [20] |
| CTACTCTTCTGAAAAGCGTCG |
| SCC*mec*Ⅳb | TCTGGAATTACTTCAGCTGC | 493 | [20] |
| AAACAATATTGCTCTCCCTC |
| SCC*mec*Ⅳc | ACAATATTTGTATTATCGGAGAGC | 200 | [20] |
| TTGGTATGAGGTATTGCTGG |
| SCC*mec*Ⅳd | CTCAAAATACGGACCCCAATACA | 881 | [20] |
| TGCTCCAGTAATTGCTAAAG |
| SCC*mec* V | GAACATTGTTACTTAAATGAGCG | 325 | [20] |
| TGAAAGTTGTACCCTTGACACC |
| **Antibiotic-resistant genes** | | | |
| *erm*(A) | AAGCGGTAAACCCCTCTGA | 190 | [21] |
| TTCGCAAATCCCTTCTCAAC |
| *erm*(C) | AATCGTCAATTCCTGCATGT | 299 | [21] |
| TAATCGTGGAATACGGGTTTG |
| *tet*(K) | TTAGGTGAAGGGTTAGGTCC | 360 | [22] |
| GCAAACTCATTCCAGAAGCA |
| *tet*(M) | GTTAAATAGTGTTCTTGGAG | 158 | [22] |
| CTAAGATATGGCTCTAACAA |
| **Immune evasion cluster genes** | | | |
| *scn* | AGCACAAGCTTGCCAACATCG | 258 | [23] |
| TTAATATTTACTTTTTAGTGC |
| *chp* | TTTACTTTTGAACCGTTTCCTAC | 365 | [23] |
| CGTCCTGAATTCTTAGTATGCATATTCATTAG |
| *sak* | AAGGCGATGACGCGAGTTAT | 223 | [23] |
| GCGCTTGGATCTAATTCAAC |
| **Enterotoxin genes** | | | |
| *sea* | CCTTTGGAAACGGTTAAAACG | 127 | [24] |
| TCTGAACCTTCCCATCAAAAAC |
| *seb* | TCGCATCAAACTGACAAACG | 477 | [24] |
| GCAGGTACTCTATAAGTGCCTGC |
| *sec* | CTCAAGAACTAGACATAAAAGCTAGG | 271 | [24] |
| TCAAAATCGGATTAACATTATCC |
| *sed* | CTAGTTTGGTAATATCTCCTTTAAACG | 319 | [24] |
| TTAATGCTATATCTTATAGGGTAAACATC |
| *see* | CAGTACCTATAGATAAAGTTAAAACAAGC | 178 | [24] |
| TAACTTACCGTGGACCCTTC |
| *seg* | AAGTAGACATTTTTGGCGTTCC | 287 | [24] |
| AGAACCATCAAACTCGTATAGC |
| *seh* | GTCTATATGGAGGTACAACACT | 213 | [24] |
| GACCTTTACTTATTTCGCTGTC |
| *sei* | GGTGATATTGGTGTAGGTAAC | 454 | [24] |
| ATCCATATTCTTTGCCTTTACCAG |
| *sej* | ATAGCATCAGAACTGTTGTTCCG | 152 | [24] |
| CTTTCTGAATTTTACCACCAAAGG |
| *sek* | TAGGTGTCTCTAATAATGCCA | 293 | [24] |
| TAGATATTCGTTAGTAGCTG |
| *sem* | GGATAATTCGACAGTAACAG | 379 | [24] |
| TCCTGCATTAAATCCAGAAC |
| *seo* | TGTGTAAGAAGTCAAGTGTAG | 214 | [24] |
| TCTTTAGAAATCGCTGATGA |
| *sel* | TAACGGCGATGTAGGTCCAGG | 383 | [24] |
| CATCTATTTCTTGTGCGGTAAC |
| *sen* | TATGTTAATGCTGAAGTAGAC | 282 | [24] |
| ATTTCCAAAATACAGTCCATA |
| *sep* | TGATTTATTAGTAGACCTTGG | 396 | [24] |
| ATAACCAACCGAATCACCAG |
| *seq* | AATCTCTGGGTCAATGGTAAGC | 122 | [24] |
| TTGTATTCGTTTTGTAGGTATTTTCG |
| *ser* | GGATAAAGCGGTAATAGCAG | 166 | [24] |
| GTATTCCAAACACATCTAAC |
| *seu* | ATCAGAAACAAACATTAAAGCCCA | 500 | [24] |
| TGACCATTTCCTTCGATAAACTTTAT |
| **Hemolysin genes** | | | |
| *hla* | CTGATTACTATCCAAGAAATTCGATTG | 209 | [25] |
| CTTTCCAGCCTACTTTTTTATCAGT |
| *hlb* | GTGCACTTACTGACAATAGTGC | 305 | [23] |
| GTTGATGAGTAGCTACCTTCAGT |
| *hld* | AAGAATTTTTATCTTAATTAAGGAAGGAGTG | 111 | [25] |
| TTAGTGAATTTGTTCACTGTGTCGA |
| *pvl gene* | ATCATTAGGTAAAATGTCTGGACATGATCCA | 433 | [26] |
| GCATCAAGTGTATTGGATAGCAAAAGC |
| *tsst1gene* | AAGCCCTTTGTTGCTTGCG | 447 | [24] |
| ATCGAACTTTGGCCCATACTTT |
